# Supplementary material for: Location dependent coordination chemistry and MRI relaxivity, in de novo designed lanthanide coiled coils
Source: Royal Society of Chemistry journal article supplement (doi:10.1039/c5sc04101e), 2015-12-22
Supplement: c5sc04101e1.pdf [file c5sc04101e1.pdf]

## Supporting Information

### Location dependent coordination chemistry and MRI relaxivity, in *de novo* designed lanthanide coiled coils

Matthew R. Berwick<sup>†</sup>, Louise N. Slope<sup>†</sup>, Caitlin F. Smith<sup>†</sup>, Siobhan M. King<sup>†</sup>, Sarah L. Newton<sup>†</sup>,  
Richard B. Gillis<sup>‡‡</sup>, Gary G. Adams<sup>‡‡</sup>, Arthur J. Rowe<sup>‡</sup>, Stephen E. Harding<sup>‡</sup>, Melanie M.  
Britton<sup>†</sup>, Anna F. A. Peacock<sup>†\*</sup>

<sup>†</sup>*School of Chemistry, University of Birmingham, Edgbaston, B15 2TT, UK*

<sup>‡</sup>*National Centre for Macromolecular Hydrodynamics, School of Biosciences, University of Nottingham, Sutton Bonington, LE12 5RD, UK*

<sup>‡‡</sup>*School of Health Sciences, The University of Nottingham, Queen's Medical Centre, Nottingham, NG7 2HA, UK*

\*To whom correspondence should be addressed. E-mail: a.f.a.peacock@bham.ac.uk

#### Contents:

1. Methods  
Figure S1 – RARE imaging pulse sequence
2. Table S1 – Table of percentage folded values
3. Table S2 – Sedimentation equilibrium results
4. Table S3 – Relaxivity values upon addition of extra trimer equivalence
5. Figure S2 – CD Gd(III) titration
6. Figure S3 – CD chemical denaturation
7. Figure S4 – CD thermal unfolding
8. Figure S5 – CD Tb(III) titration
9. Figure S6 – Excitation and absorption profiles
10. Figure S7 – Tryptophan emission spectra
11. Figure S8 - Luminescence titration of CS1-1
12. Figure S9 - CD spectra of CS1-1, CS1-2 and CS1-4

13. Figure S10 – Emission spectra in H<sub>2</sub>O and D<sub>2</sub>O
14. Figure S11– Magnetic resonance imaging of phantom samples
15. Figure S12 – Relaxivity plots
16. Figure S13 – HPLC and mass spectrum for MB1-1
17. Figure S14 – HPLC and mass spectrum for MB1-2
18. Figure S15 – HPLC and mass spectrum for MB1-3
19. Figure S16 – HPLC and mass spectrum for MB1-4
20. Figure S17 – HPLC and mass spectrum for CS1-1
21. Figure S18 – HPLC and mass spectrum for CS1-2
22. Figure S19 – HPLC and mass spectrum for CS1-4
23. References

## 1. Methods

**Chemical Denaturation.** Chemical unfolding data was recorded by monitoring the ellipticity at 222 nm of a 30  $\mu\text{M}$  solution of peptide monomer in 5 mM HEPES buffer pH 7.0 in the absence and presence of 10  $\mu\text{M}$   $\text{GdCl}_3$ , as a function of urea concentration (from 0  $\rightarrow$  6.5 M).

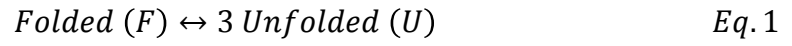

The chemical denaturation data was fit to a two-state folded to three monomers equilibrium model (see equation 1) as outlined by B. Buer.<sup>1</sup>

**Diffusion Corrected  $T_2$ .** When measuring the  $T_2$  of a sample using a RARE imaging sequence (see Figure S1) the application of a gradient ( $g_R$ ) in the read direction with duration ( $2\alpha$ ) leads to signal attenuation due to the effects of water self-diffusion.<sup>2</sup> Therefore, the  $T_2$  observed ( $T_{2obs}$ ) has a diffusion weighted component ( $T_{2d}$ ). The correct  $T_2$  value ( $T_{2corr}$ ) can be determined using Equations 2 and 3, where  $\gamma$  is the proton gyromagnetic ratio,  $T_E$  is the experiment echo time and  $D$  is the diffusion coefficient of the water. The value of  $D$  was approximated to be the diffusion of water at 293 K.<sup>3</sup> An analogous expression exists for the effect of the slice gradient on the relaxation time and was employed in the correction as well.

$$\frac{1}{T_{2obs}} = \frac{1}{T_{2corr}} + \frac{1}{T_{2d}} \quad \text{Eq. 2}$$

$$\frac{1}{T_{2d}} = \gamma^2 g_R^2 \alpha^2 D \left( \frac{T_E - \frac{4}{3}\alpha}{T_E} \right) \quad \text{Eq. 3}$$

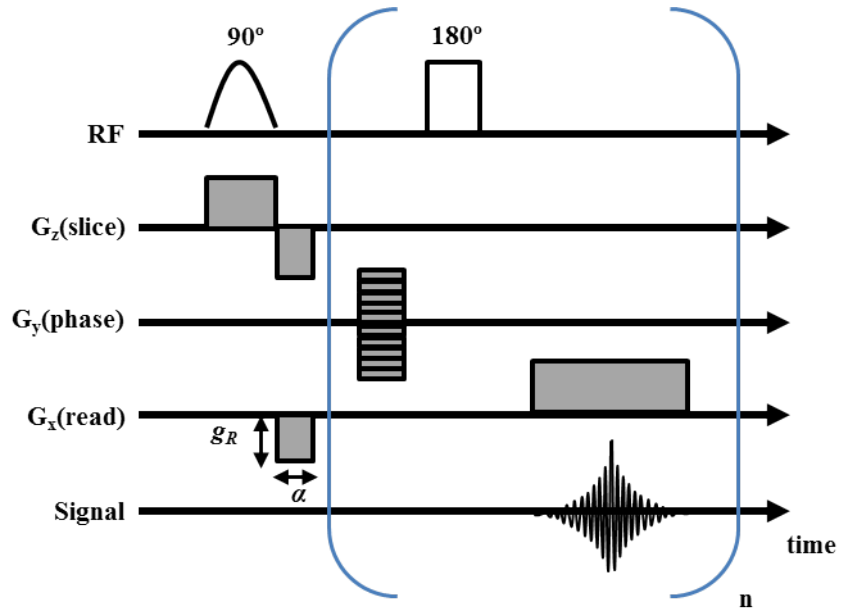

**Figure S1.** RARE imaging pulse sequence.

**2. Table S1:** Percentage folded as a function of peptide monomer concentration

|              | <b>Monomer<br/>Conc / <math>\mu</math>M</b> | <b>Apo<br/>% Folded</b> | <b>Metallo<br/>% Folded</b> |
|--------------|---------------------------------------------|-------------------------|-----------------------------|
| <b>MB1-1</b> | 5                                           | 65 $\pm$ 4              | 66 $\pm$ 6                  |
|              | 30                                          | 80 $\pm$ 6              | 83 $\pm$ 7                  |
|              | 100                                         | 85 $\pm$ 3              | 90 $\pm$ 3                  |
| <b>MB1-2</b> | 5                                           | 14 $\pm$ 2              | 22 $\pm$ 5                  |
|              | 30                                          | 21 $\pm$ 3              | 62 $\pm$ 3                  |
|              | 100                                         | 33 $\pm$ 9              | 69 $\pm$ 7                  |
| <b>MB1-3</b> | 5                                           | 11 $\pm$ 1              | 13 $\pm$ 2                  |
|              | 30                                          | 15 $\pm$ 1              | 41 $\pm$ 4                  |
|              | 100                                         | 16 $\pm$ 2              | 56 $\pm$ 5                  |
| <b>MB1-4</b> | 5                                           | 43 $\pm$ 2              | 48 $\pm$ 3                  |
|              | 30                                          | 55 $\pm$ 6              | 70 $\pm$ 5                  |
|              | 100                                         | 60 $\pm$ 6              | 76 $\pm$ 7                  |

All samples recorded in 5 mM HEPES buffer pH 7.0 at 293 K, in the absence or presence of 1/3 equivalence of GdCl<sub>3</sub>, and molar ellipticity at 222 nm converted to percentage folded. Average value taken from three repeats and reported with standard deviations.

**3. Table S2.** Weighted average molar mass, and calculated proportion of trimer, based on sedimentation equilibrium experiments performed in the presence of 1 equiv. Gd(III) per three strands of peptide monomer.

| Peptide | Weight-average molar mass / kDa | Proportion of trimer complex / %* |
|---------|---------------------------------|-----------------------------------|
| MB1-1   | 10.6 ± 0.6                      | 81 ± 7                            |
| MB1-2   | 9.0 ± 0.5                       | 61 ± 6                            |
| MB1-3   | 8.6 ± 0.4                       | 56 ± 5                            |
| MB1-4   | 10.9 ± 0.6                      | 84 ± 8                            |
| CS1-1   | 11.2 ± 0.6                      | 88 ± 7                            |

\*Assuming only presence of monomer and trimer

**4. Table S3.** Average  $1/T_1$  and  $1/T_2$  for 0.01 mM Gd(III) in the presence of two equivalence of peptide trimer, and on addition of a third equivalence.

| Peptide | $(1/T_1) / s^{-1}$ | $(1/T_1)$ third equivalence / $s^{-1}$ | $(1/T_2) / s^{-1}$ | $(1/T_2)$ third equivalence / $s^{-1}$ |
|---------|--------------------|----------------------------------------|--------------------|----------------------------------------|
| MB1-1   | $0.44 \pm 0.03$    | $0.45 \pm 0.02$                        | $1.31 \pm 0.03$    | $1.35 \pm 0.14$                        |
| MB1-2   | $0.41 \pm 0.01$    | $0.41 \pm 0.01$                        | $0.95 \pm 0.02$    | $0.93 \pm 0.03$                        |
| MB1-3   | $0.40 \pm 0.01$    | $0.40 \pm 0.01$                        | $0.93 \pm 0.05$    | $0.96 \pm 0.03$                        |
| MB1-4   | $0.43 \pm 0.02$    | $0.40 \pm 0.02$                        | $1.01 \pm 0.08$    | $0.98 \pm 0.10$                        |

## 5. Figure S2:

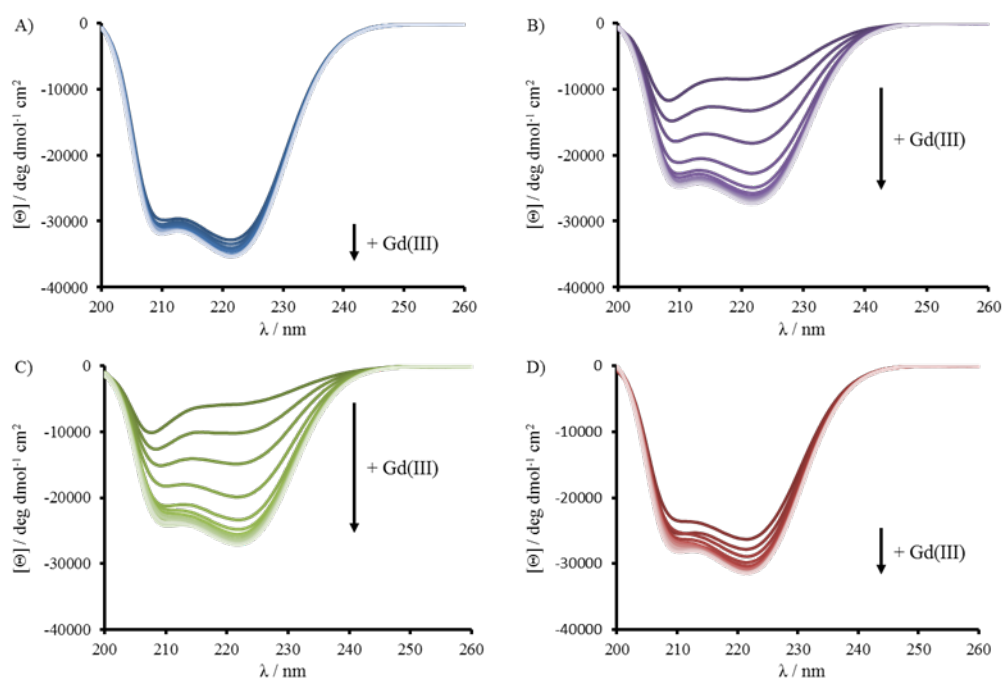

**Figure S2.** GdCl<sub>3</sub> titration into 100 μM A) MB1-1, B) MB1-2, C) MB1-3 and D) MB1-4 peptide monomer in 5 mM HEPES buffer pH 7.0, monitored by CD, going from 0 μM to 100 μM Gd(III).



## 6. Figure S3:

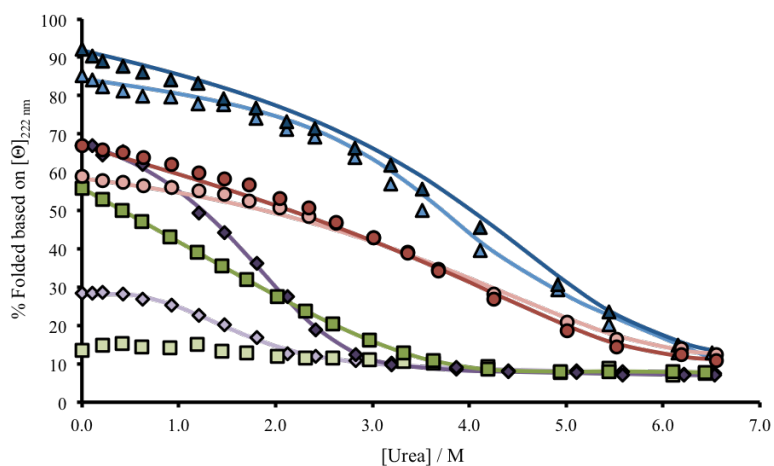

**Figure S3.** Urea chemical denaturation of 30  $\mu$ M monomer MB1-1 (blue triangles), MB1-2 (purple diamonds), MB1-3 (green squares) and MB1-4 (red circles) in the absence (light color) and presence (dark color) of 10  $\mu$ M Gd(III). Recorded in 5 mM HEPES buffer pH 7.0, monitored by CD at 222 nm, and fit to a trimer  $\leftrightarrow$  three monomer equilibrium using a nonlinear least-squares fitting (no fit was obtained for apo MB1-3).

## 7. Figure S4:

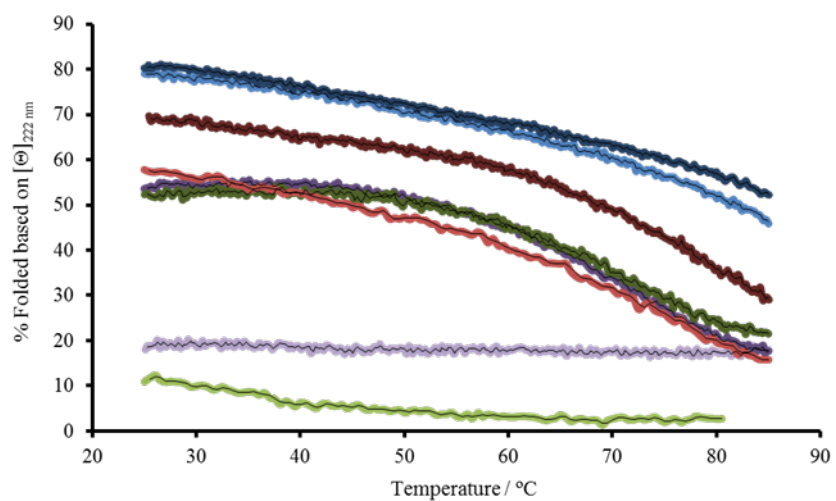

**Figure S4.** CD thermal unfolding of 30 μM MB1-1 (blue), MB1-2 (purple), MB1-3 (green) and MB1-4 (red) peptide monomer, in the absence (light color) and presence (dark color) of 10 μM GdCl<sub>3</sub>. Recorded in 5 mM HEPES buffer pH 7.0.

8. Figure S5:

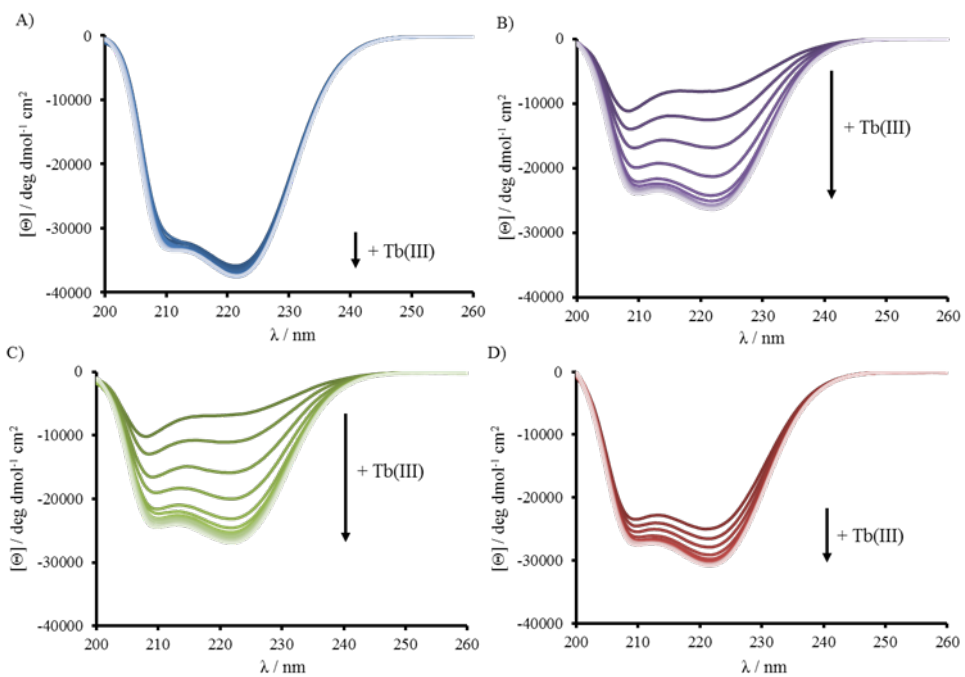

**Figure S5.**  $\text{TbCl}_3$  titration into 100  $\mu\text{M}$  A) MB1-1, B) MB1-2, C) MB1-3 and D) MB1-4 peptide monomer in 5 mM HEPES buffer pH 7.0 monitored by CD, going from 0  $\mu\text{M}$  to 100  $\mu\text{M}$   $\text{Tb(III)}$ .

## 9. Figure S6:

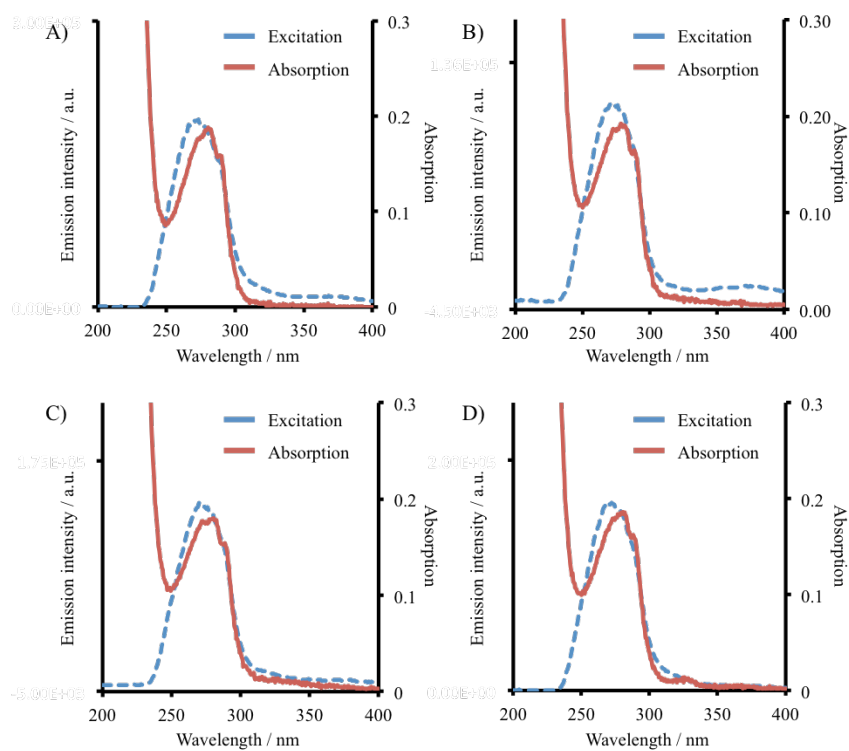

**Figure S6.** Absorption (solid red) and excitation (dashed blue) spectra of a solution containing 10  $\mu\text{M}$   $\text{TbCl}_3$  and 30  $\mu\text{M}$  A) MB1-1, B) MB1-2, C) MB1-3 and D) MB1-4, at 293 K in 10 mM HEPES buffer pH 7.0, with  $\lambda_{\text{em}} = 545$  nm. Excitation spectrum is corrected for lamp response.

10. Figure S7:

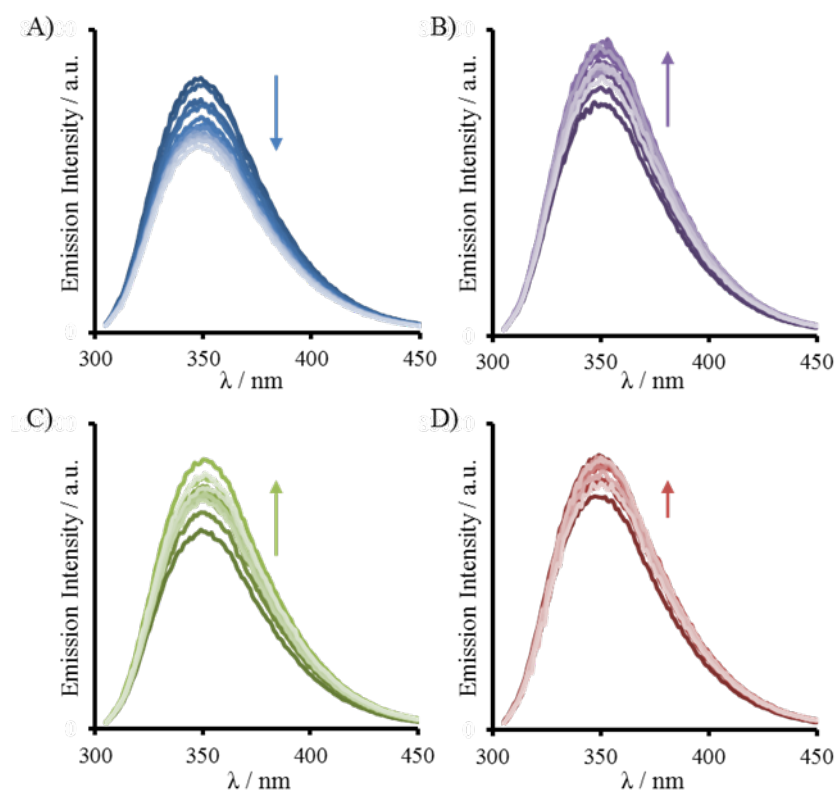

**Figure S7.** Tryptophan emission spectra upon titration of Tb(III) into 30  $\mu$ M peptide monomer for A) MB1-1 (blue), B) MB1-2 (purple), C) MB1-3 (green) and D) MB1-4 (red). All samples recorded at 293 K in the presence of 10 mM HEPES buffer pH 7.0.  $\lambda_{\text{exc}} = 280$  nm.

## 11. Figure S8:

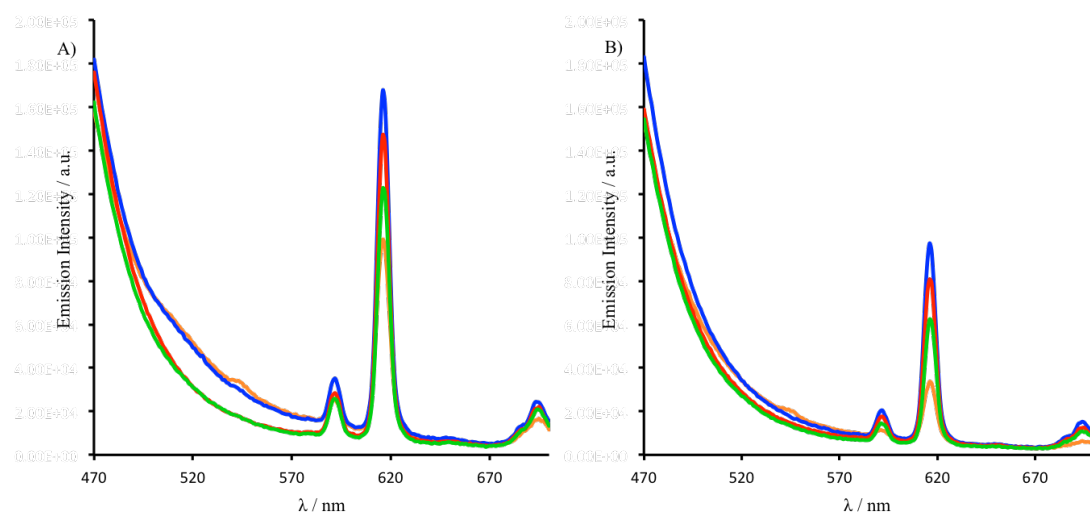

**Figure S8.** Emission spectra of 30  $\mu$ M MB1-1 (orange), MB1-2 (blue), MB1-3 (red), MB1-4 (green) monomer peptide recorded in A)  $D_2O$  and B)  $H_2O$ , in the presence of 10  $\mu$ M  $EuCl_3$ , recorded at 293 K in 10 mM HEPES buffer pH 7.0.  $\lambda_{exc} = 280$  nm.

## 12. Figure S9:

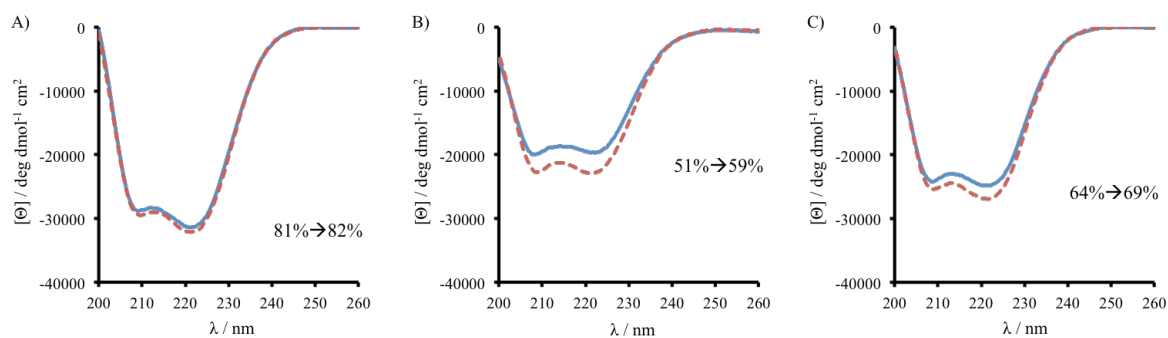

**Figure S9.** CD spectra of  $30 \mu\text{M}$  A) CS1-1, B) CS1-2 and C) CS1-4 peptide monomer, in the absence (solid blue line) and presence of  $10 \mu\text{M}$   $\text{TbCl}_3$  (dashed red line), recorded at 293 K in 5 mM HEPES buffer pH 7.0.

13. Figure S10:

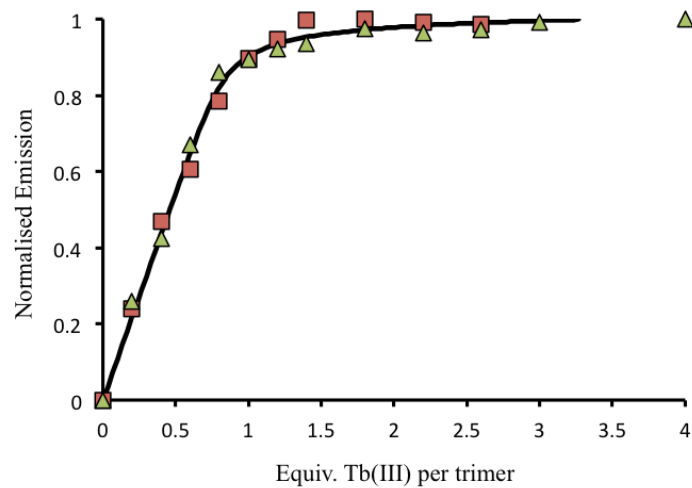

**Figure S10.** Luminescence titration of  $\text{TbCl}_3$  into  $30 \mu\text{M}$  CS1-1 peptide monomer in  $10 \text{ mM}$  HEPES buffer pH 7.0, at  $293 \text{ K}$ . Data fit to  $\text{M} + 3\text{L} \rightarrow \text{ML}_3$  model using DynaFit.  $\lambda_{\text{exc}} = 280 \text{ nm}$ .



14. Figure S11:

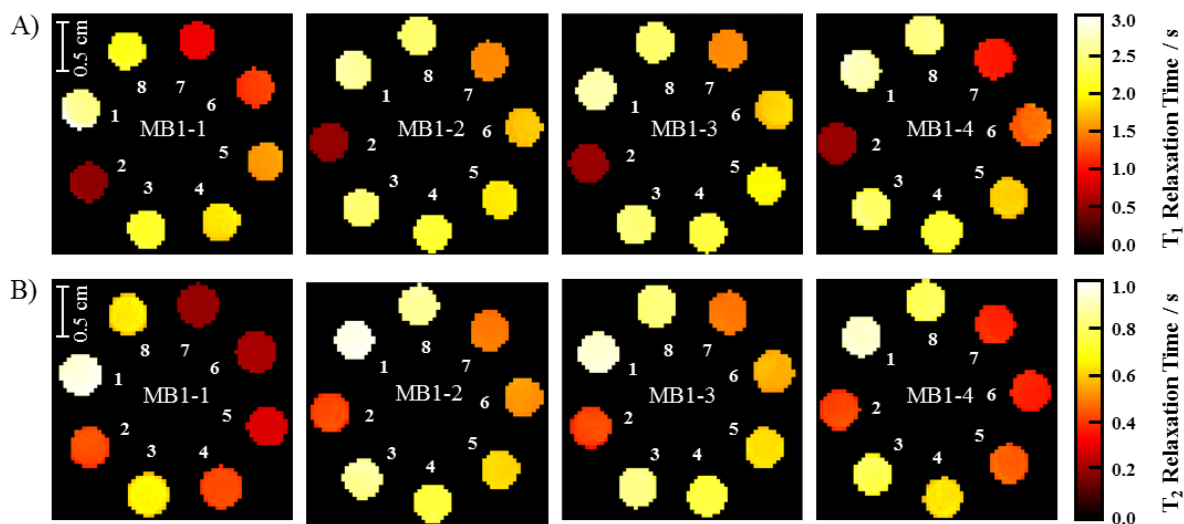

**Figure S11.** T<sub>1</sub> (a) and T<sub>2</sub> (b) NMR relaxation maps for MB1-1 to MB1-4 recorded in 10 mM HEPES buffer pH 7.0, at 293 K. Images recorded using 5 mm NMR tubes containing 10 mM HEPES buffer pH 7.0 (1), 0.1 mM GdCl<sub>3</sub> (2), 0.01, 0.02, 0.03, 0.04 and 0.05 mM Gd(III) + 2 equivalences of trimer (3-7), and 0.01 mM Gd(III) + 3 equivalences of trimer (8). Images analysed using PROSPA.

15. Figure S12:

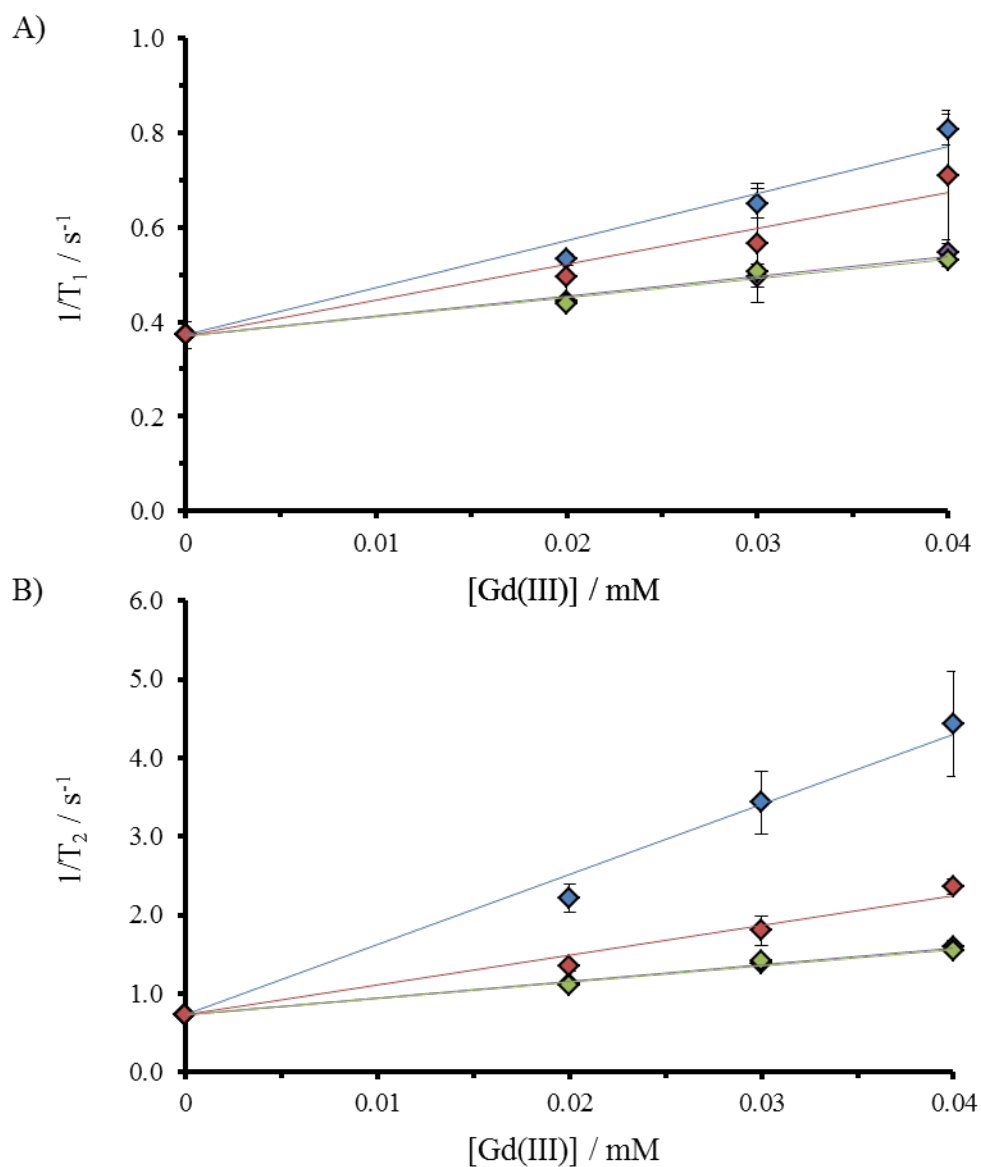

**Figure S12.** Relaxivity plot showing reciprocal of relaxation time as a function of Gd(III) concentration, for A)  $T_1$  and B)  $T_2$  relaxation rates Gd(MB1-1)<sub>3</sub> (blue), Gd(MB1-2)<sub>3</sub> (purple), Gd(MB1-3)<sub>3</sub> (green) and Gd(MB1-4)<sub>3</sub> (red). All samples recorded at 293 K in the presence of 10 mM HEPES buffer pH 7.0, with 2 equivalences of peptide trimer to GdCl<sub>3</sub>. All samples recorded on a 300 MHz NMR spectrometer.

16. Figure S13:

A)

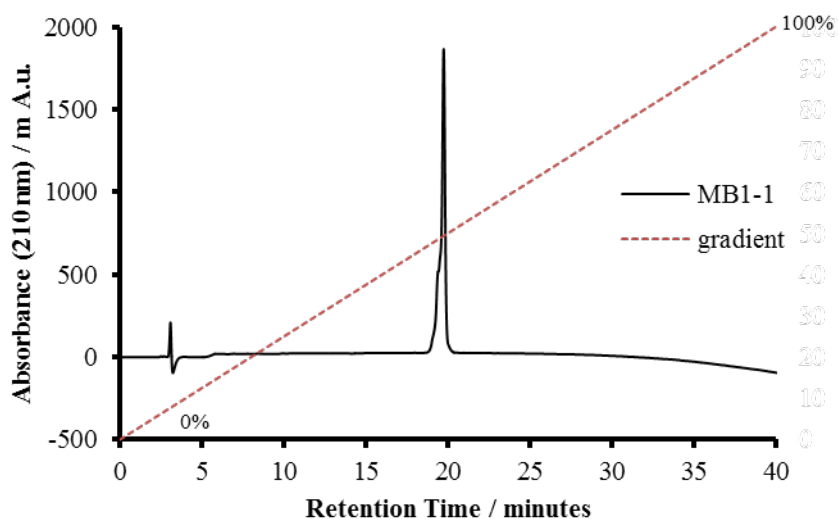

B)

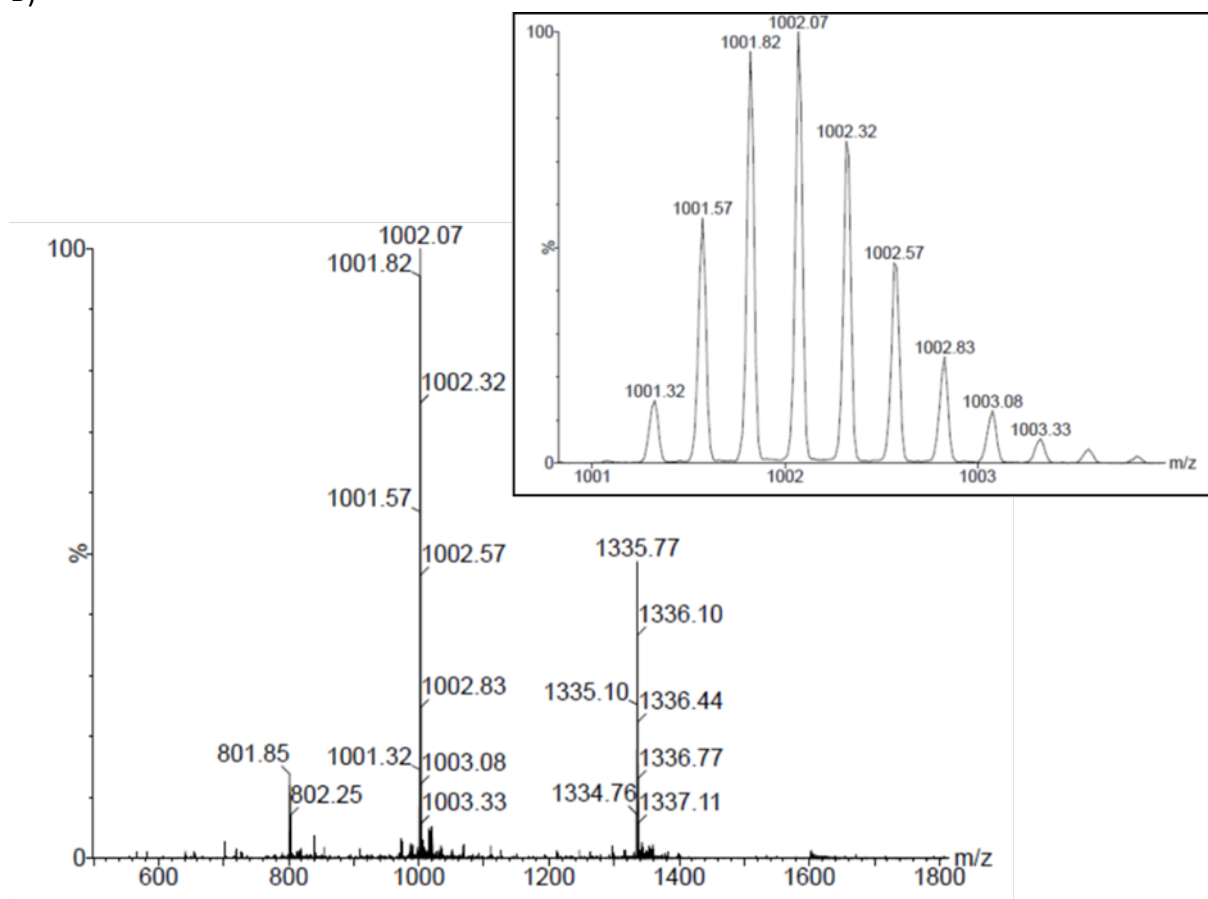

**Figure S13.** (A) C18-analytical HPLC trace of pure MB1-1 using a linear 0 to 100% MeCN + 0.05% TFA gradient in H<sub>2</sub>O + 0.05% TFA over 40 minutes. (B) Electrospray mass spectrum of pure MB1-1 with inset showing isotope distribution from [M+4H]<sup>4+</sup> peak.

17. Figure S14:

A)

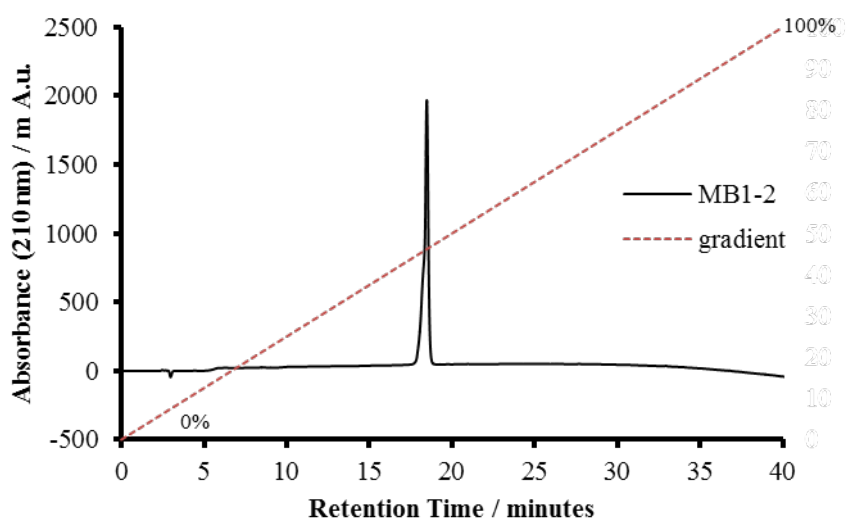

B)

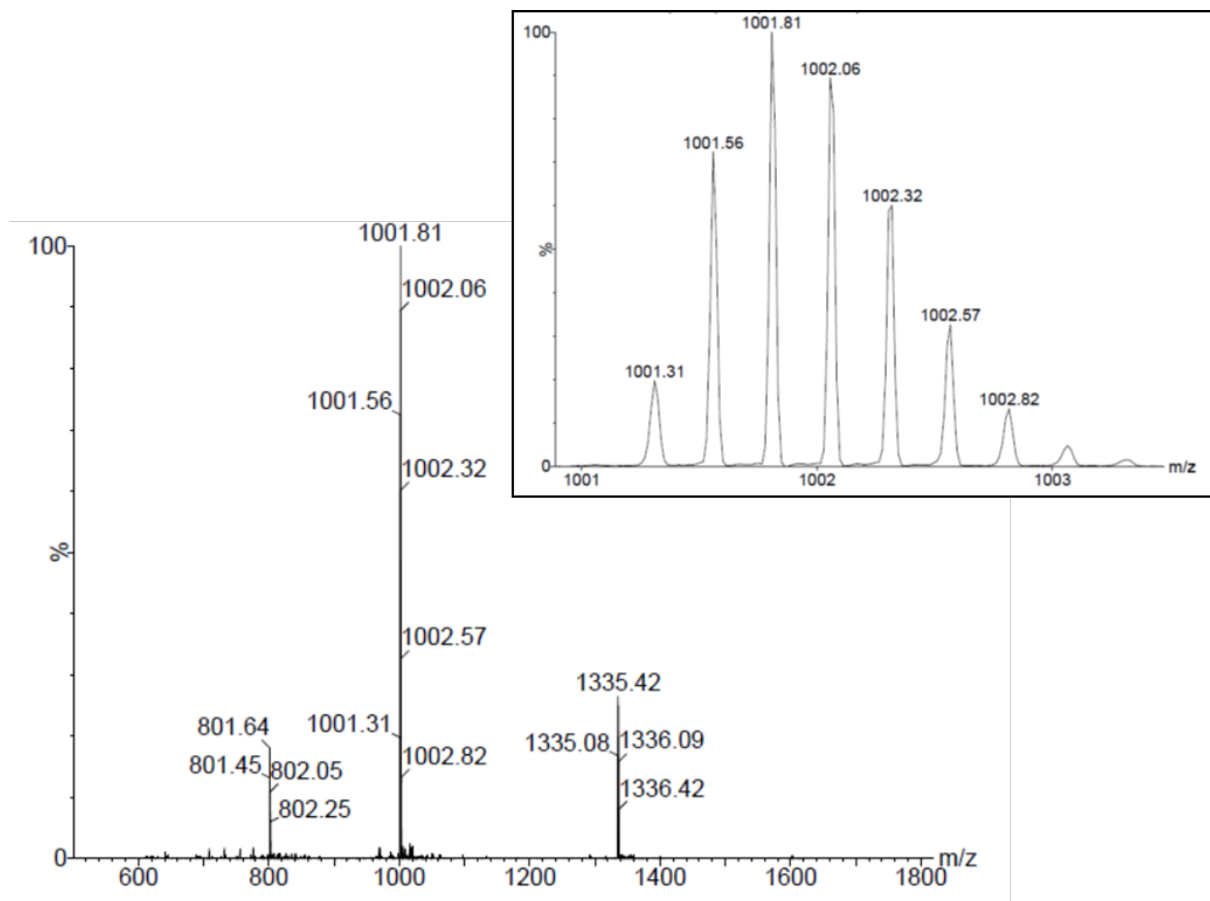

**Figure S14.** (A) C18-analytical HPLC trace of pure MB1-2 using a linear 0 to 100% MeCN + 0.05% TFA gradient in H<sub>2</sub>O + 0.05% TFA over 40 minutes. (B) Electrospray mass spectrum of pure MB1-2 with inset showing isotope distribution from [M+4H]<sup>4+</sup> peak.

18. Figure S15:

A)

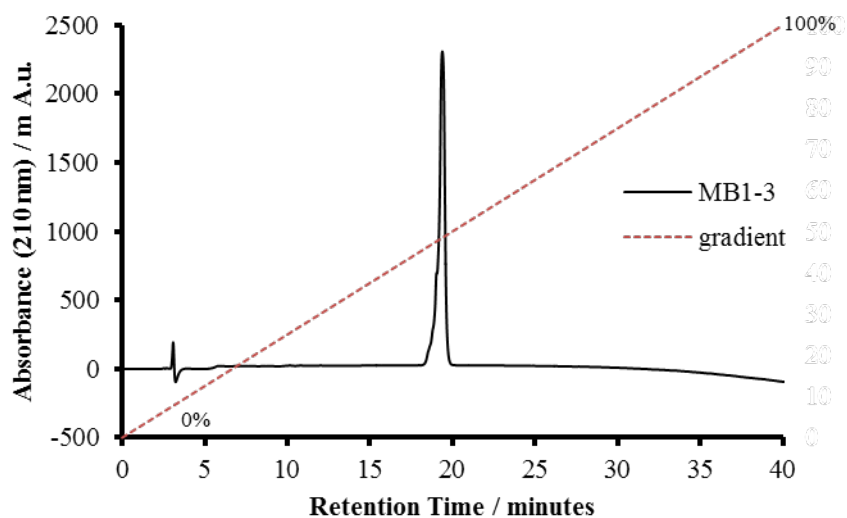

B)

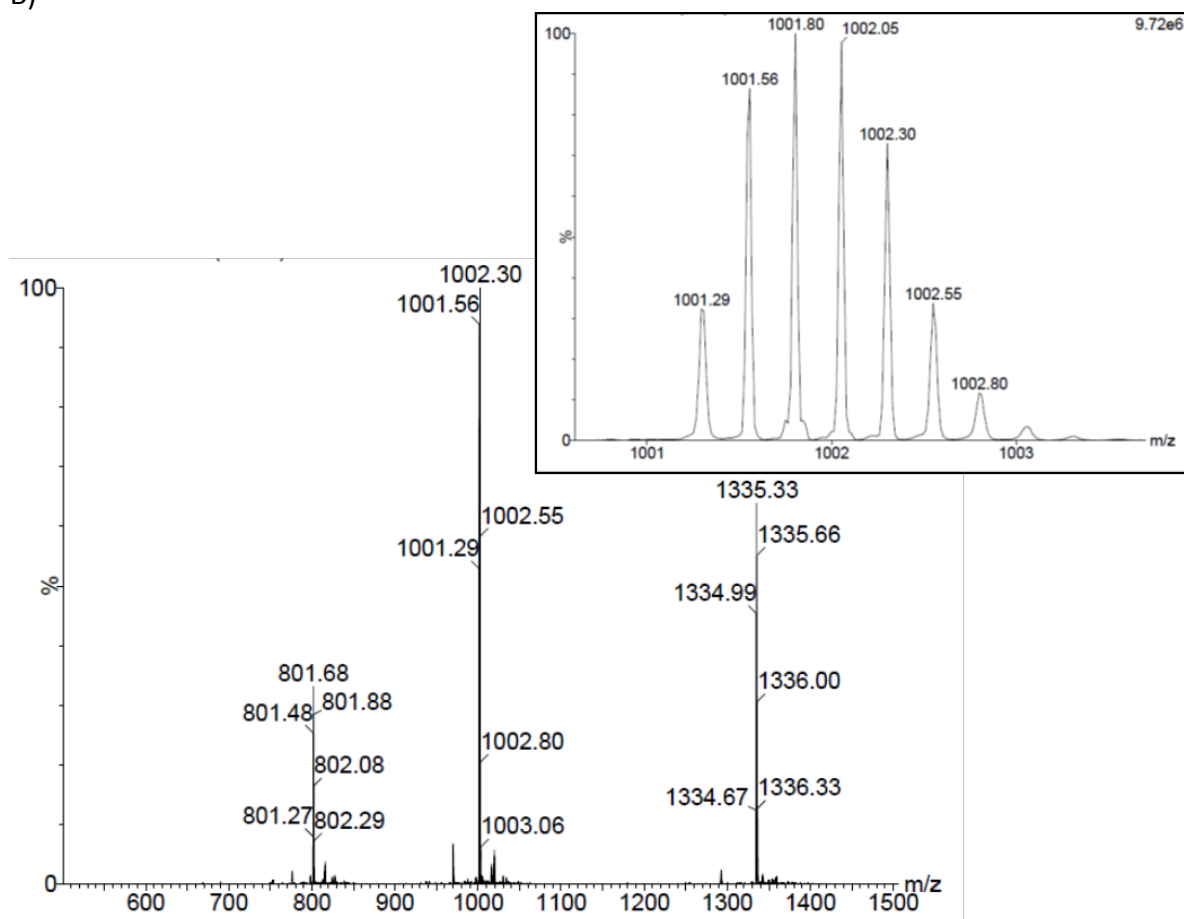

**Figure S15.** (A) C18-analytical HPLC trace of pure MB1-3 using a linear 0 to 100% MeCN + 0.05% TFA gradient in H<sub>2</sub>O + 0.05% TFA over 40 minutes. (B) Electrospray mass spectrum of pure MB1-3 with inset showing isotope distribution from [M+4H]<sup>4+</sup> peak.

19. Figure S16:

A)

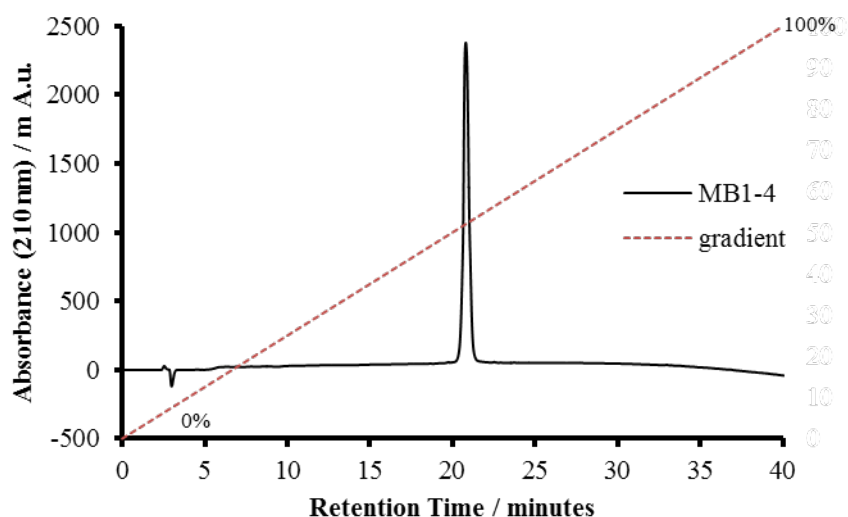

B)

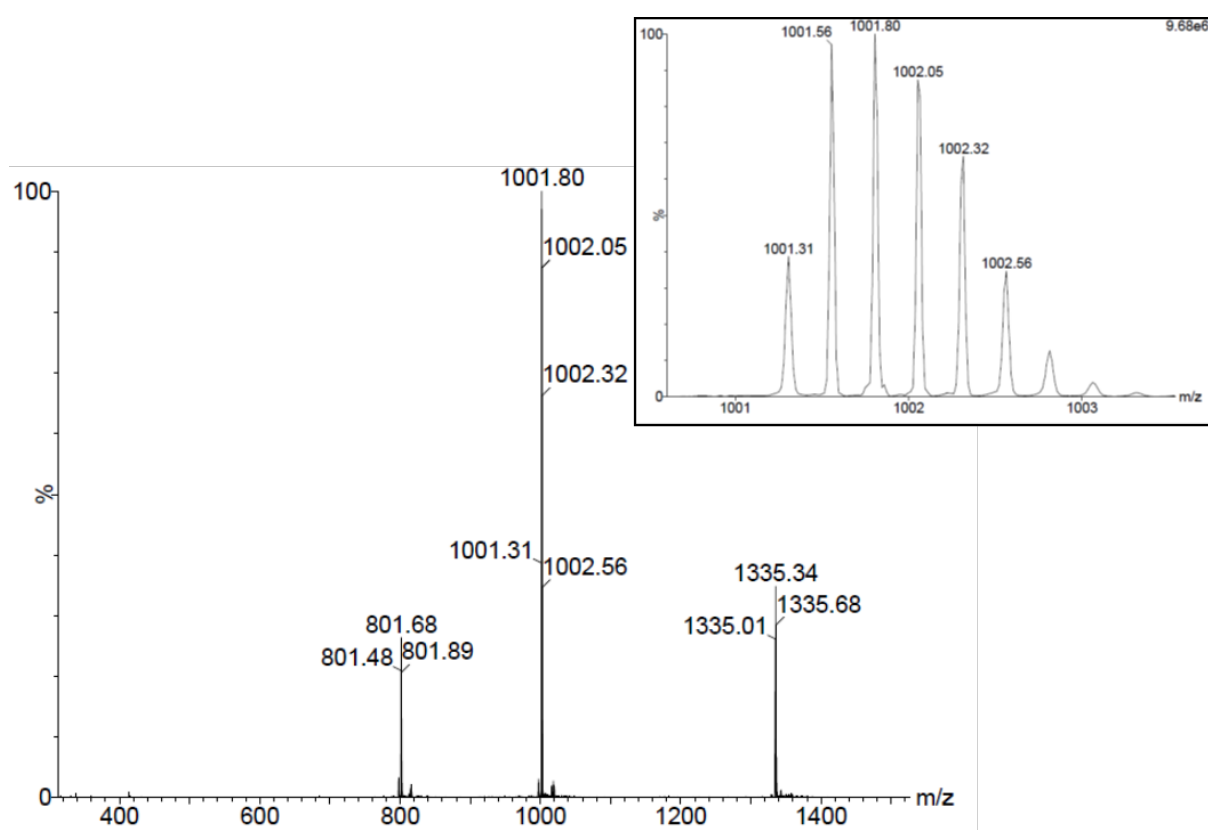

**Figure S16.** (A) C18-analytical HPLC trace of pure MB1-4 using a linear 0 to 100% MeCN + 0.05% TFA gradient in H<sub>2</sub>O + 0.05% TFA over 40 minutes. (B) Electrospray mass spectrum of pure MB1-4 with inset showing isotope distribution from [M+4H]<sup>4+</sup> peak.

20. Figure S17:

A)

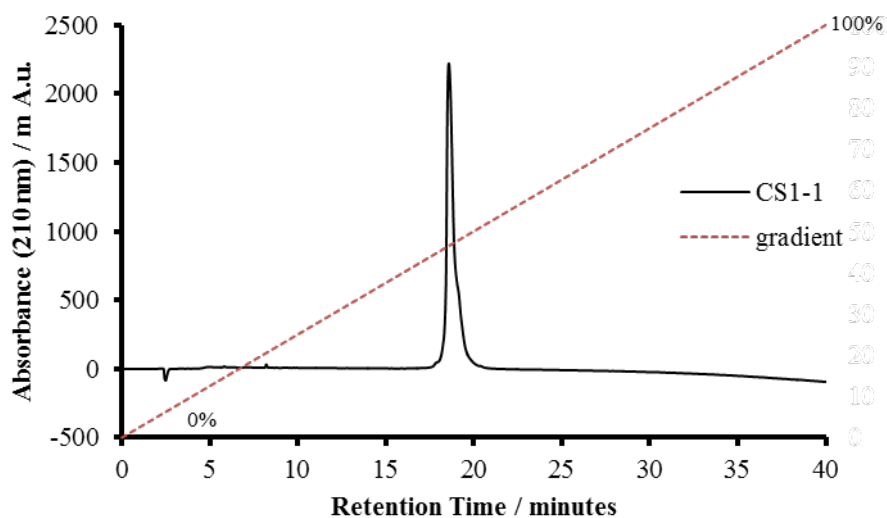

B)

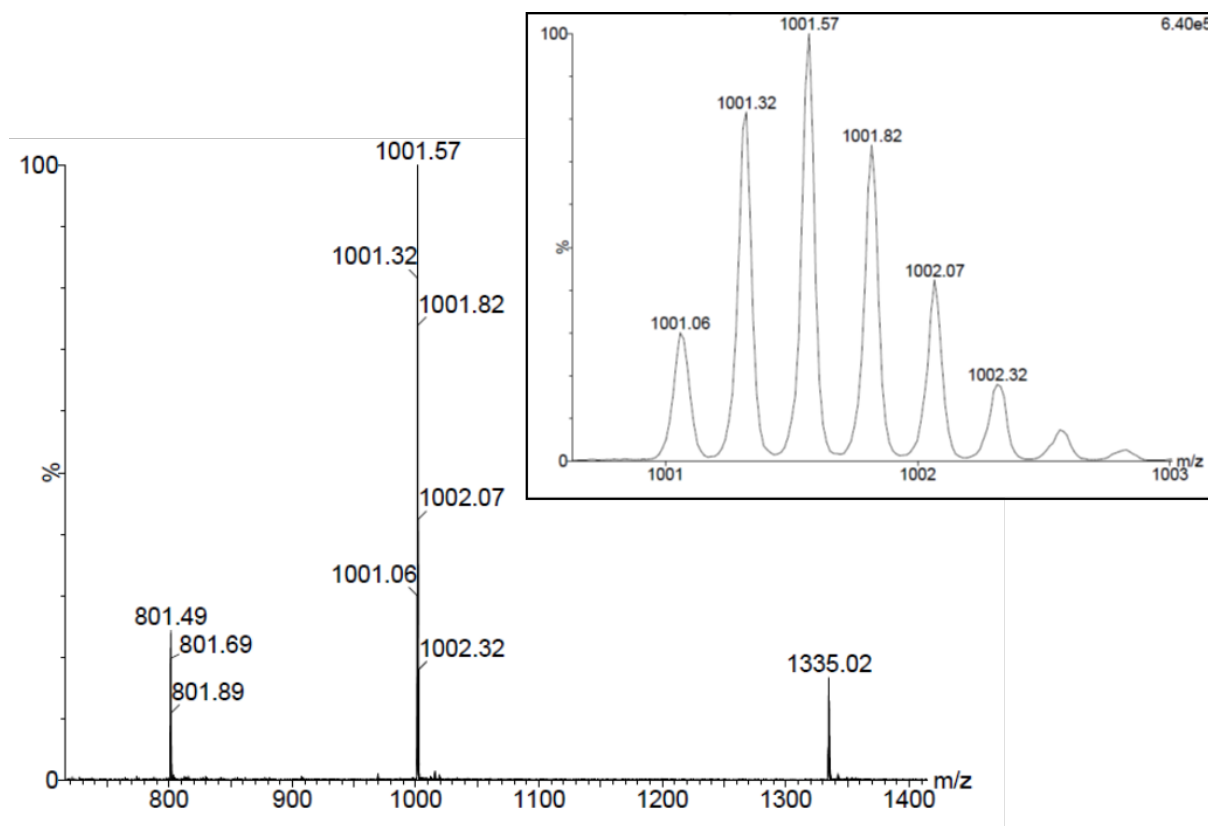

**Figure S17.** (A) C18-analytical HPLC trace of pure CS1-1 using a linear 0 to 100% MeCN + 0.05% TFA gradient in H<sub>2</sub>O + 0.05% TFA over 40 minutes. (B) Electrospray mass spectrum of pure CS1-1 with inset showing isotope distribution from [M+4H]<sup>4+</sup> peak.

21. Figure S18:

A)

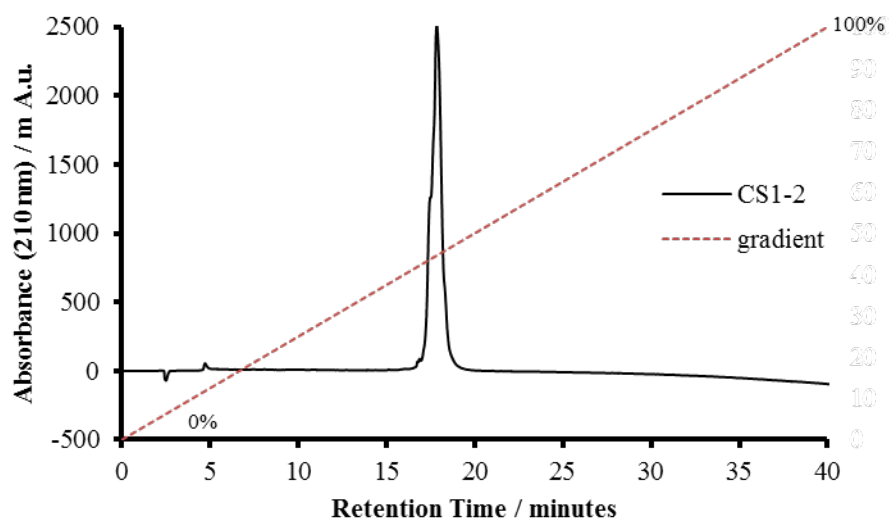

B)

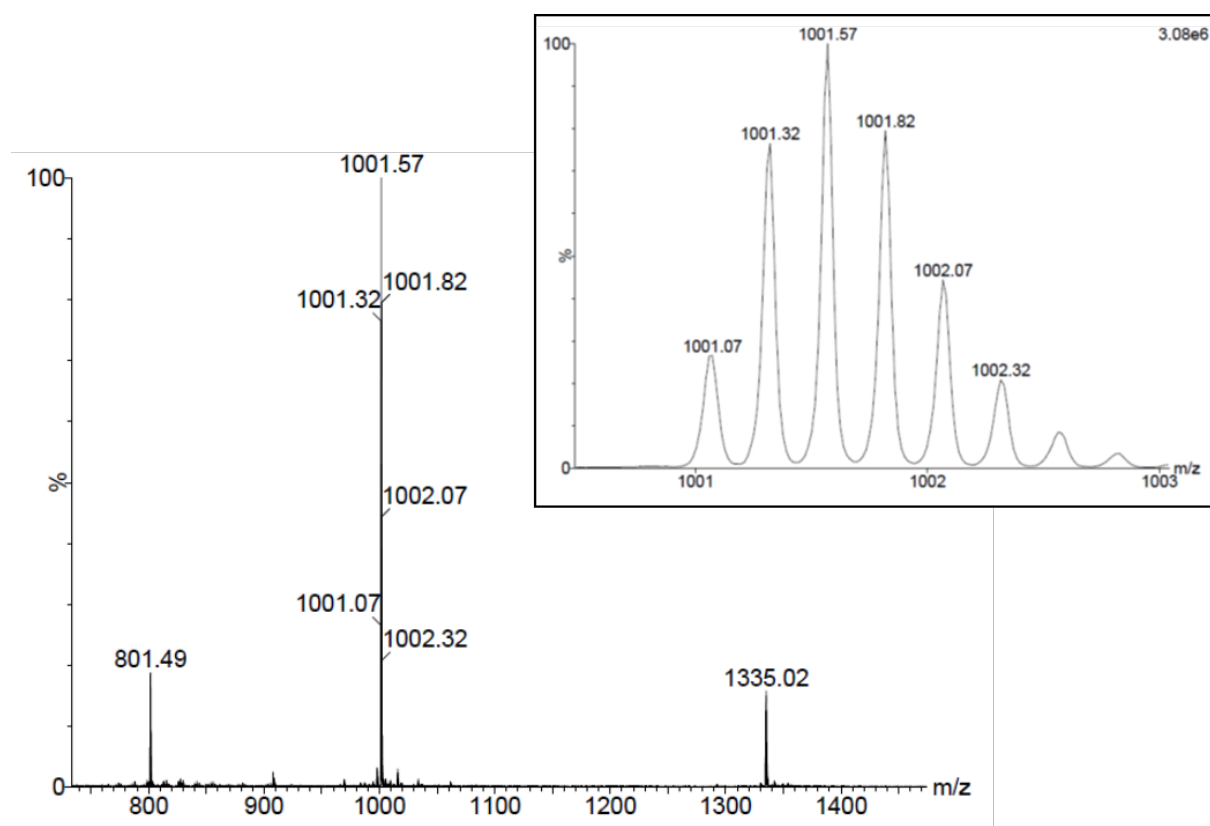

**Figure S18.** (A) C18-analytical HPLC trace of pure CS1-2 using a linear 0 to 100% MeCN + 0.05% TFA gradient in H<sub>2</sub>O + 0.05% TFA over 40 minutes. (B) Electrospray mass spectrum of pure CS1-2 with inset showing isotope distribution from [M+4H]<sup>4+</sup> peak.



22. Figure S19:

A)

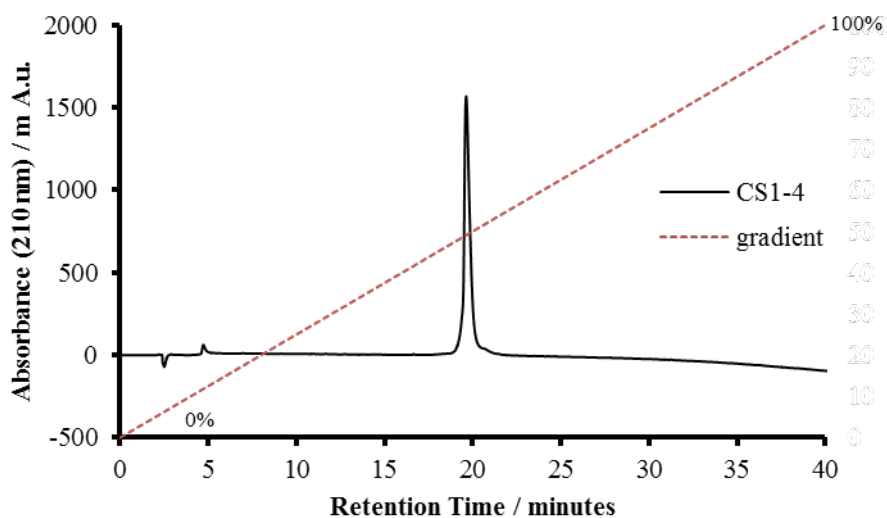

B)

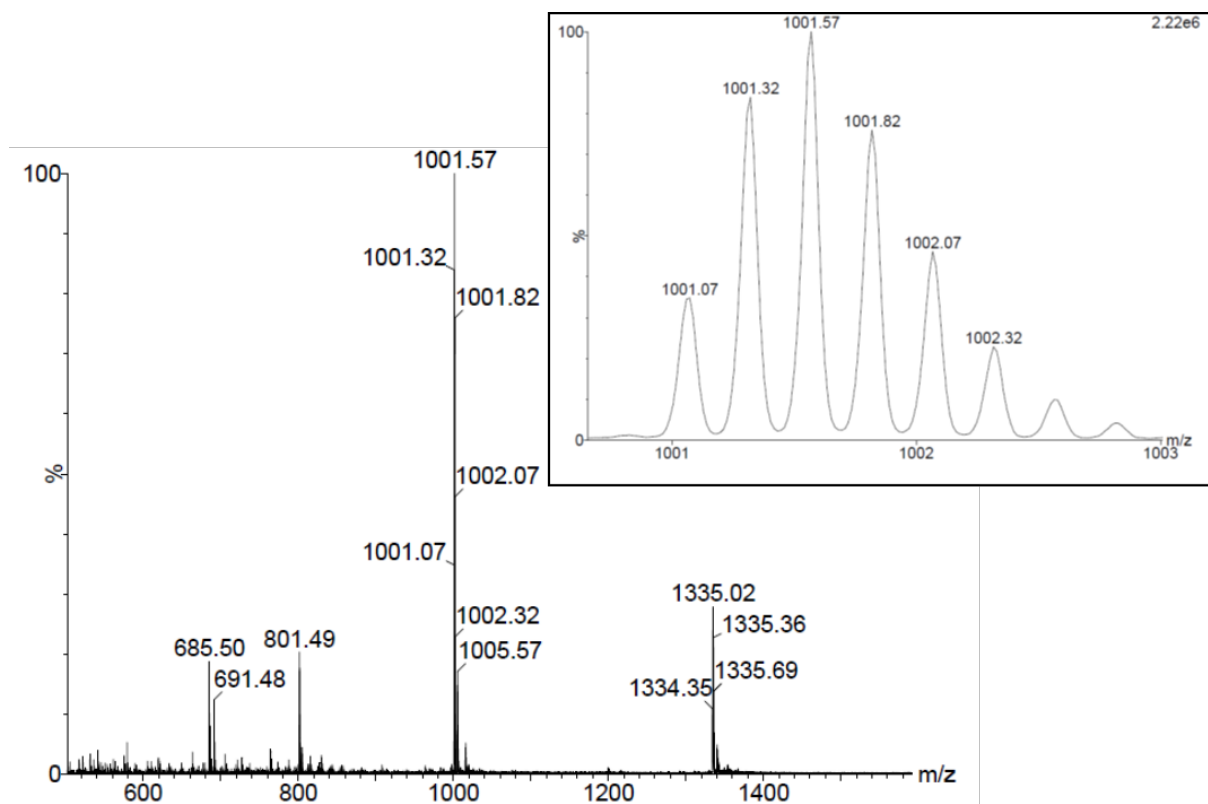

**Figure S19.** (A) C18-analytical HPLC trace of pure CS1-4 using a linear 0 to 100% MeCN + 0.05% TFA gradient in H<sub>2</sub>O + 0.05% TFA over 40 minutes. (B) Electrospray mass spectrum of pure CS1-4 with inset showing isotope distribution from [M+4H]<sup>4+</sup> peak.

### 23. References:

- 1) B. Buer, in *Protein Design: Methods and Applications*, ed. V. Köhler, Humana Press, New York, 2nd edn, 2014, Design, Synthesis, and Study of Fluorinated Proteins, pp 89-116.
- 2) H. T. Edzes, D. V. Dusschoten and H. van As, *Magn. Reson. Imaging*, 1998, **16**, 185.
- 3) M. Holz, S. R. Heil, A. Sacco, *Phys. Chem. Chem. Phys.*, 2000, **2**, 4740.
